# Supplementary material for: Longitudinal single-cell profiling reveals molecular heterogeneity and tumor-immune evolution in refractory mantle cell lymphoma
Source: Nat Commun. 2021 May 17;12:2877. doi: 10.1038/s41467-021-22872-z (PMC8128874; doi:10.1038/s41467-021-22872-z)
Supplement: Supplementary file 12 — Reporting Summary [file 41467_2021_22872_MOESM12_ESM.pdf]

## Reporting Summary

Nature Research wishes to improve the reproducibility of the work that we publish. This form provides structure for consistency and transparency in reporting. For further information on Nature Research policies, see our [Editorial Policies](#) and the [Editorial Policy Checklist](#).

### Statistics

For all statistical analyses, confirm that the following items are present in the figure legend, table legend, main text, or Methods section.

- |                                     |                                                                                                                                                                                                                                                                                                |
|-------------------------------------|------------------------------------------------------------------------------------------------------------------------------------------------------------------------------------------------------------------------------------------------------------------------------------------------|
| n/a                                 | Confirmed                                                                                                                                                                                                                                                                                      |
| <input type="checkbox"/>            | <input checked="" type="checkbox"/> The exact sample size ( $n$ ) for each experimental group/condition, given as a discrete number and unit of measurement                                                                                                                                    |
| <input type="checkbox"/>            | <input checked="" type="checkbox"/> A statement on whether measurements were taken from distinct samples or whether the same sample was measured repeatedly                                                                                                                                    |
| <input type="checkbox"/>            | <input checked="" type="checkbox"/> The statistical test(s) used AND whether they are one- or two-sided<br><i>Only common tests should be described solely by name; describe more complex techniques in the Methods section.</i>                                                               |
| <input checked="" type="checkbox"/> | <input type="checkbox"/> A description of all covariates tested                                                                                                                                                                                                                                |
| <input type="checkbox"/>            | <input checked="" type="checkbox"/> A description of any assumptions or corrections, such as tests of normality and adjustment for multiple comparisons                                                                                                                                        |
| <input type="checkbox"/>            | <input checked="" type="checkbox"/> A full description of the statistical parameters including central tendency (e.g. means) or other basic estimates (e.g. regression coefficient) AND variation (e.g. standard deviation) or associated estimates of uncertainty (e.g. confidence intervals) |
| <input type="checkbox"/>            | <input checked="" type="checkbox"/> For null hypothesis testing, the test statistic (e.g. $F$ , $t$ , $r$ ) with confidence intervals, effect sizes, degrees of freedom and $P$ value noted<br><i>Give <math>P</math> values as exact values whenever suitable.</i>                            |
| <input checked="" type="checkbox"/> | <input type="checkbox"/> For Bayesian analysis, information on the choice of priors and Markov chain Monte Carlo settings                                                                                                                                                                      |
| <input checked="" type="checkbox"/> | <input type="checkbox"/> For hierarchical and complex designs, identification of the appropriate level for tests and full reporting of outcomes                                                                                                                                                |
| <input type="checkbox"/>            | <input checked="" type="checkbox"/> Estimates of effect sizes (e.g. Cohen's $d$ , Pearson's $r$ ), indicating how they were calculated                                                                                                                                                         |

*Our web collection on [statistics for biologists](#) contains articles on many of the points above.*

### Software and code

Policy information about [availability of computer code](#)

|                 |                                                                                                                                                                                                                                                                                                                                                                                                                                                                                                                                                                                                           |
|-----------------|-----------------------------------------------------------------------------------------------------------------------------------------------------------------------------------------------------------------------------------------------------------------------------------------------------------------------------------------------------------------------------------------------------------------------------------------------------------------------------------------------------------------------------------------------------------------------------------------------------------|
| Data collection | No software was used for data collection. No external data were used in this study. All single cell RNA sequencing data were generated locally in our MGL laboratory of MD Anderson Cancer Center.                                                                                                                                                                                                                                                                                                                                                                                                        |
| Data analysis   | Data analysis was performed using our standard bioinformatics pipelines, as described in the Methods. All softwares and algorithms that were applied in this study have been described previously in published literatures, which were listed in the References.<br>FlowJo, FACSDiva, Cell Ranger v 2.0.2; R version 3.4; Seurat v3; Monocle 2; inferCNV (v0.99); R GSEA package (version 3.9); iTALK (latest version); BWA (v0.7.5); GATK (v3.1-1); MuTect (v1.1.4); Pindel; CNTools (v1.24.0); SC3; TSCAN (v1.0); Slingshot (v0.1.3); SCORPIUS (v1.0.2); fishplot (v0.5) and sequenza (v3.0.0) package. |

For manuscripts utilizing custom algorithms or software that are central to the research but not yet described in published literature, software must be made available to editors and reviewers. We strongly encourage code deposition in a community repository (e.g. GitHub). See the Nature Research [guidelines for submitting code & software](#) for further information.

### Data

Policy information about [availability of data](#)

All manuscripts must include a [data availability statement](#). This statement should provide the following information, where applicable:

- Accession codes, unique identifiers, or web links for publicly available datasets
- A list of figures that have associated raw data
- A description of any restrictions on data availability

All single cell expression data generated by this study have been deposited in the European Genome-Phenome Archive (GEA) under the accession number EGAS00001005019. We downloaded the normalized expression data of two MCL patient cohorts, in order to assess the prognostic significance of survivin upregulation in MCL. One dataset was downloaded from Rosenwald et al's website: <https://llmpp.nih.gov/MCL/>, and another dataset was downloaded from the

GEO database under the access code GSE10793 (<https://www.ncbi.nlm.nih.gov/geo/query/acc.cgi?acc=GSE10793>). 50 hallmark cancer gene sets were downloaded from MSigDB (<https://www.gsea-msigdb.org/gsea/msigdb/index.jsp>).

## Field-specific reporting

Please select the one below that is the best fit for your research. If you are not sure, read the appropriate sections before making your selection.

☒ Life sciences ☐ Behavioural & social sciences ☐ Ecological, evolutionary & environmental sciences

For a reference copy of the document with all sections, see [nature.com/documents/nr-reporting-summary-flat.pdf](https://www.nature.com/documents/nr-reporting-summary-flat.pdf)

## Life sciences study design

All studies must disclose on these points even when the disclosure is negative.

|                 |                                                                                                                                                                                                                                                                                                                                                                                                                                      |
|-----------------|--------------------------------------------------------------------------------------------------------------------------------------------------------------------------------------------------------------------------------------------------------------------------------------------------------------------------------------------------------------------------------------------------------------------------------------|
| Sample size     | No sample size calculation was performed. scRNA sequencing n = 21 samples from n= 5 patients, 2 normal PBMC samples from healthy donors and 4 PDX samples. 5 mice per treatment were used for functional studies. Deep WES sequencing n = 6 samples from n=2 patient. Validation cohorts included flow cytometry 65 samples from 22 patients. In addition, we use previously published WES 14 patients and 21 patients bulk RNA-seq. |
| Data exclusions | No exclusion criteria was pre-established. No samples were excluded from this study. For single cell data, genes detected in <0.1% of total sequenced cells and cells where < 200 genes had nonzero counts were filtered out and not included in the analysis. Low quality cells where > 10% of the counts were derived from the mitochondrial genome were also discarded.                                                           |
| Replication     | The experiments were performed in triplicate as indicate in Figure legends to verify the results. These data can be reproducible successfully.                                                                                                                                                                                                                                                                                       |
| Randomization   | Mice were randomly assigned to different treatment groups. For the in vivo experiments, no randomization was necessary since the experiments were triplicate to verify the results.                                                                                                                                                                                                                                                  |
| Blinding        | Investigators are blinded to specific patient identities during data analysis. The data analysis team were not involved in patient recruitment, data collection.                                                                                                                                                                                                                                                                     |

## Reporting for specific materials, systems and methods

We require information from authors about some types of materials, experimental systems and methods used in many studies. Here, indicate whether each material, system or method listed is relevant to your study. If you are not sure if a list item applies to your research, read the appropriate section before selecting a response.

### Materials & experimental systems

| n/a                                 | Involved in the study                                           |
|-------------------------------------|-----------------------------------------------------------------|
| <input type="checkbox"/>            | <input checked="" type="checkbox"/> Antibodies                  |
| <input type="checkbox"/>            | <input checked="" type="checkbox"/> Eukaryotic cell lines       |
| <input checked="" type="checkbox"/> | <input type="checkbox"/> Palaeontology and archaeology          |
| <input type="checkbox"/>            | <input checked="" type="checkbox"/> Animals and other organisms |
| <input type="checkbox"/>            | <input checked="" type="checkbox"/> Human research participants |
| <input checked="" type="checkbox"/> | <input type="checkbox"/> Clinical data                          |
| <input checked="" type="checkbox"/> | <input type="checkbox"/> Dual use research of concern           |

### Methods

| n/a                                 | Involved in the study                              |
|-------------------------------------|----------------------------------------------------|
| <input checked="" type="checkbox"/> | <input type="checkbox"/> ChIP-seq                  |
| <input type="checkbox"/>            | <input checked="" type="checkbox"/> Flow cytometry |
| <input checked="" type="checkbox"/> | <input type="checkbox"/> MRI-based neuroimaging    |

## Antibodies

|                 |                                                                                                                                                       |
|-----------------|-------------------------------------------------------------------------------------------------------------------------------------------------------|
| Antibodies used | Antibodies used in this work are listed in supplementary data 8.                                                                                      |
| Validation      | Antibodies were validated by the manufactures and information is available on their websites. Catalogue numbers are provided in supplementary data 8. |

## Eukaryotic cell lines

Policy information about [cell lines](#)

|                          |                                                                                     |
|--------------------------|-------------------------------------------------------------------------------------|
| Cell line source(s)      | JeKo-1, JeKo BTK KD, Mino, Mino ABT-199 R, Rec-1, Rec ABT-199 R, Maver-1, and Z-138 |
| Authentication           | DNA fingerprinting                                                                  |
| Mycoplasma contamination | Confirmed that no mycoplasma was present                                            |

Commonly misidentified lines  
(See [ICLAC](#) register)

No commonly misidentified cell lines was used in the study.

## Animals and other organisms

Policy information about [studies involving animals](#); [ARRIVE guidelines](#) recommended for reporting animal research

Laboratory animals

6-8 week old female NSG mice from Jackson Laboratory. Housing condition: 14/-hour light/10 hour dark cycle, ambient temperature and 40-60% humidity.

Wild animals

No wild animals were used in the study.

Field-collected samples

No field collected samples were used in the study.

Ethics oversight

MD Anderson IACUC

Note that full information on the approval of the study protocol must also be provided in the manuscript.

## Human research participants

Policy information about [studies involving human research participants](#)

Population characteristics

The study population includes two females and three males aged 45 to 69. The details are listed in supplementary data 1.

Recruitment

The patients were selected for scRNA seq analysis based on patient therapeutic treatment, responses and sample availability. Due to the small cohort size, this may impact the results to be generalized. But we provided verification in larger validation cohorts.

Ethics oversight

MD Anderson Cancer center IRB

Note that full information on the approval of the study protocol must also be provided in the manuscript.

## Flow Cytometry

### Plots

Confirm that:

- ☐ The axis labels state the marker and fluorochrome used (e.g. CD4-FITC).
- ☐ The axis scales are clearly visible. Include numbers along axes only for bottom left plot of group (a 'group' is an analysis of identical markers).
- ☐ All plots are contour plots with outliers or pseudocolor plots.
- ☒ A numerical value for number of cells or percentage (with statistics) is provided.

### Methodology

Sample preparation

The patient samples were collected from peripheral blood, apheresis, or bone marrow, and subject to PBMC isolation and crypreservation. The samples were thawed and prepared in single cell suspension followed by extracellular staining and fixation-based intracellular staining using fluorescence-conjugated antibodies.

Instrument

LSRFortessa X-20 analyzer

Software

The software used to collect the data was BD FACSDiva software and the software used to analyze the data was flowjo.

Cell population abundance

The cells was stained and analyzed without prior sorting. The cell populations was determined by cell surface markers.

Gating strategy

The cells was first gated by FSC and SSC-->single cell population-->live cell population with live/dead cell staining ->cell surface markers to determine cell populations. This is shown in supplementary figure 11.

- ☒ Tick this box to confirm that a figure exemplifying the gating strategy is provided in the Supplementary Information.
